# Supplementary material for: DEUCE v1.0: A neural network for probabilistic precipitation nowcasting with aleatoric and epistemic uncertainties
Source: Copernicus journal article supplement (doi:10.5194/egusphere-2023-1100), 2023-06-05

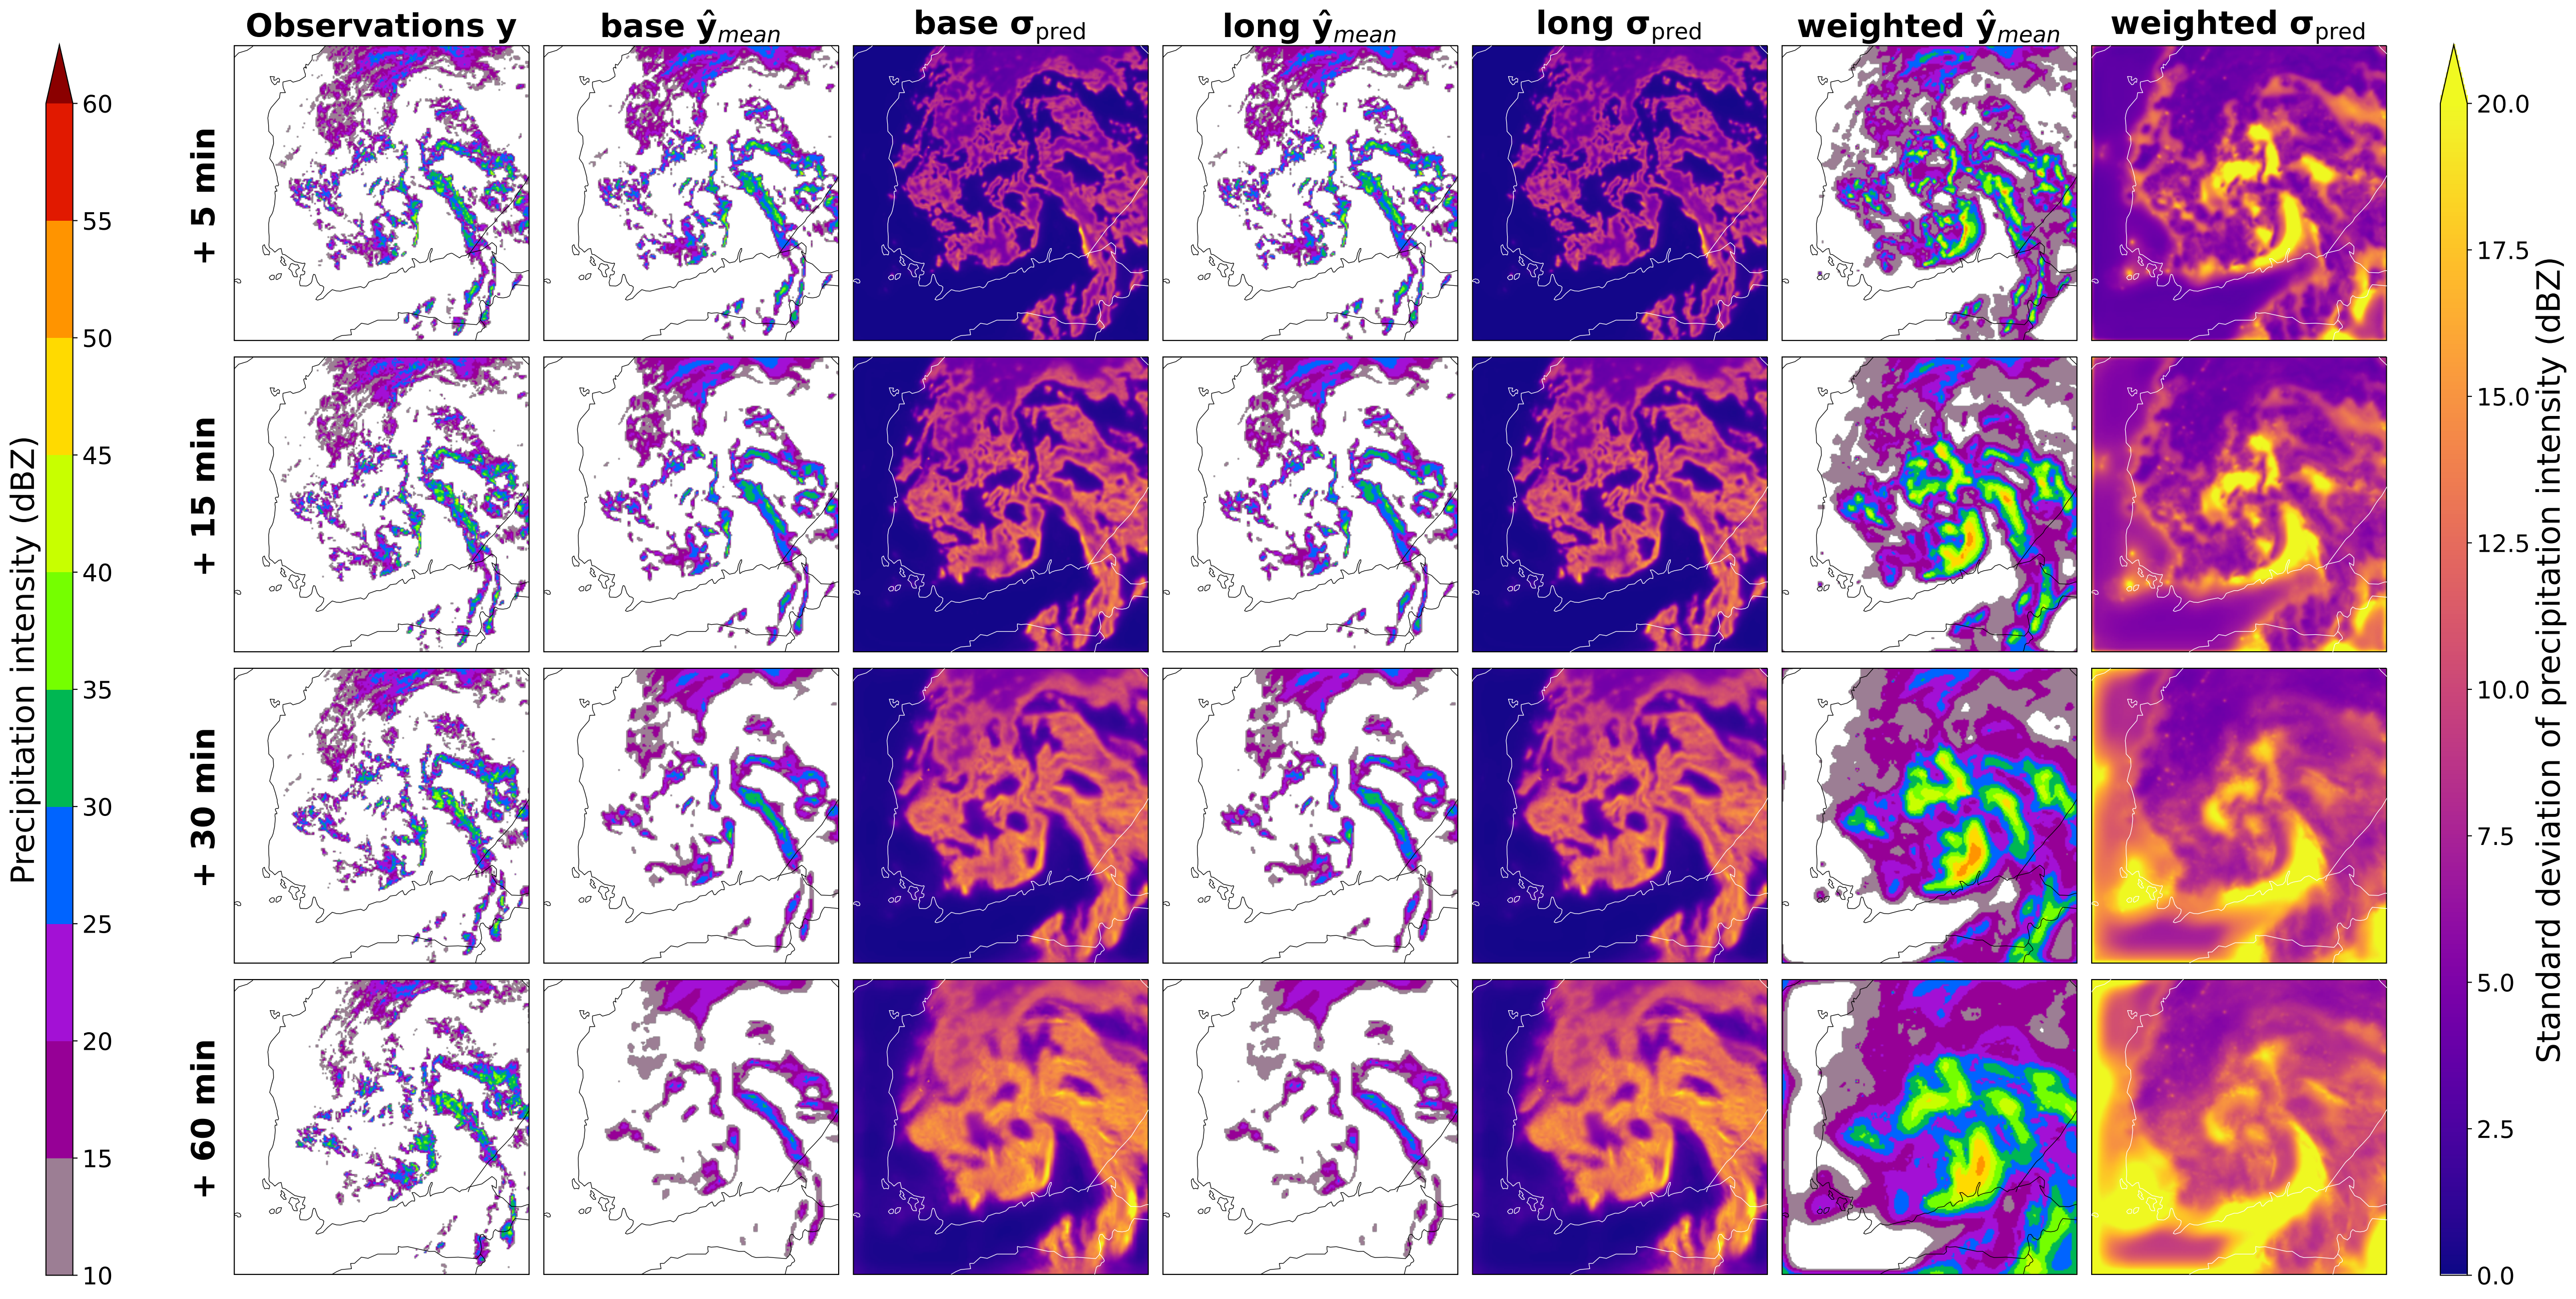

Supplement: Supplementary file [file egusphere-2023-1100-AC3-supplement.pdf]
